# Supplementary figures and images for: Molecular Characterization of Esophageal Squamous Cell Carcinoma Using Quantitative Proteomics
Source: MDPI journal article supplement (doi:10.3390/cancers15133302), 2023-06-23

Supplementary Figure S1B

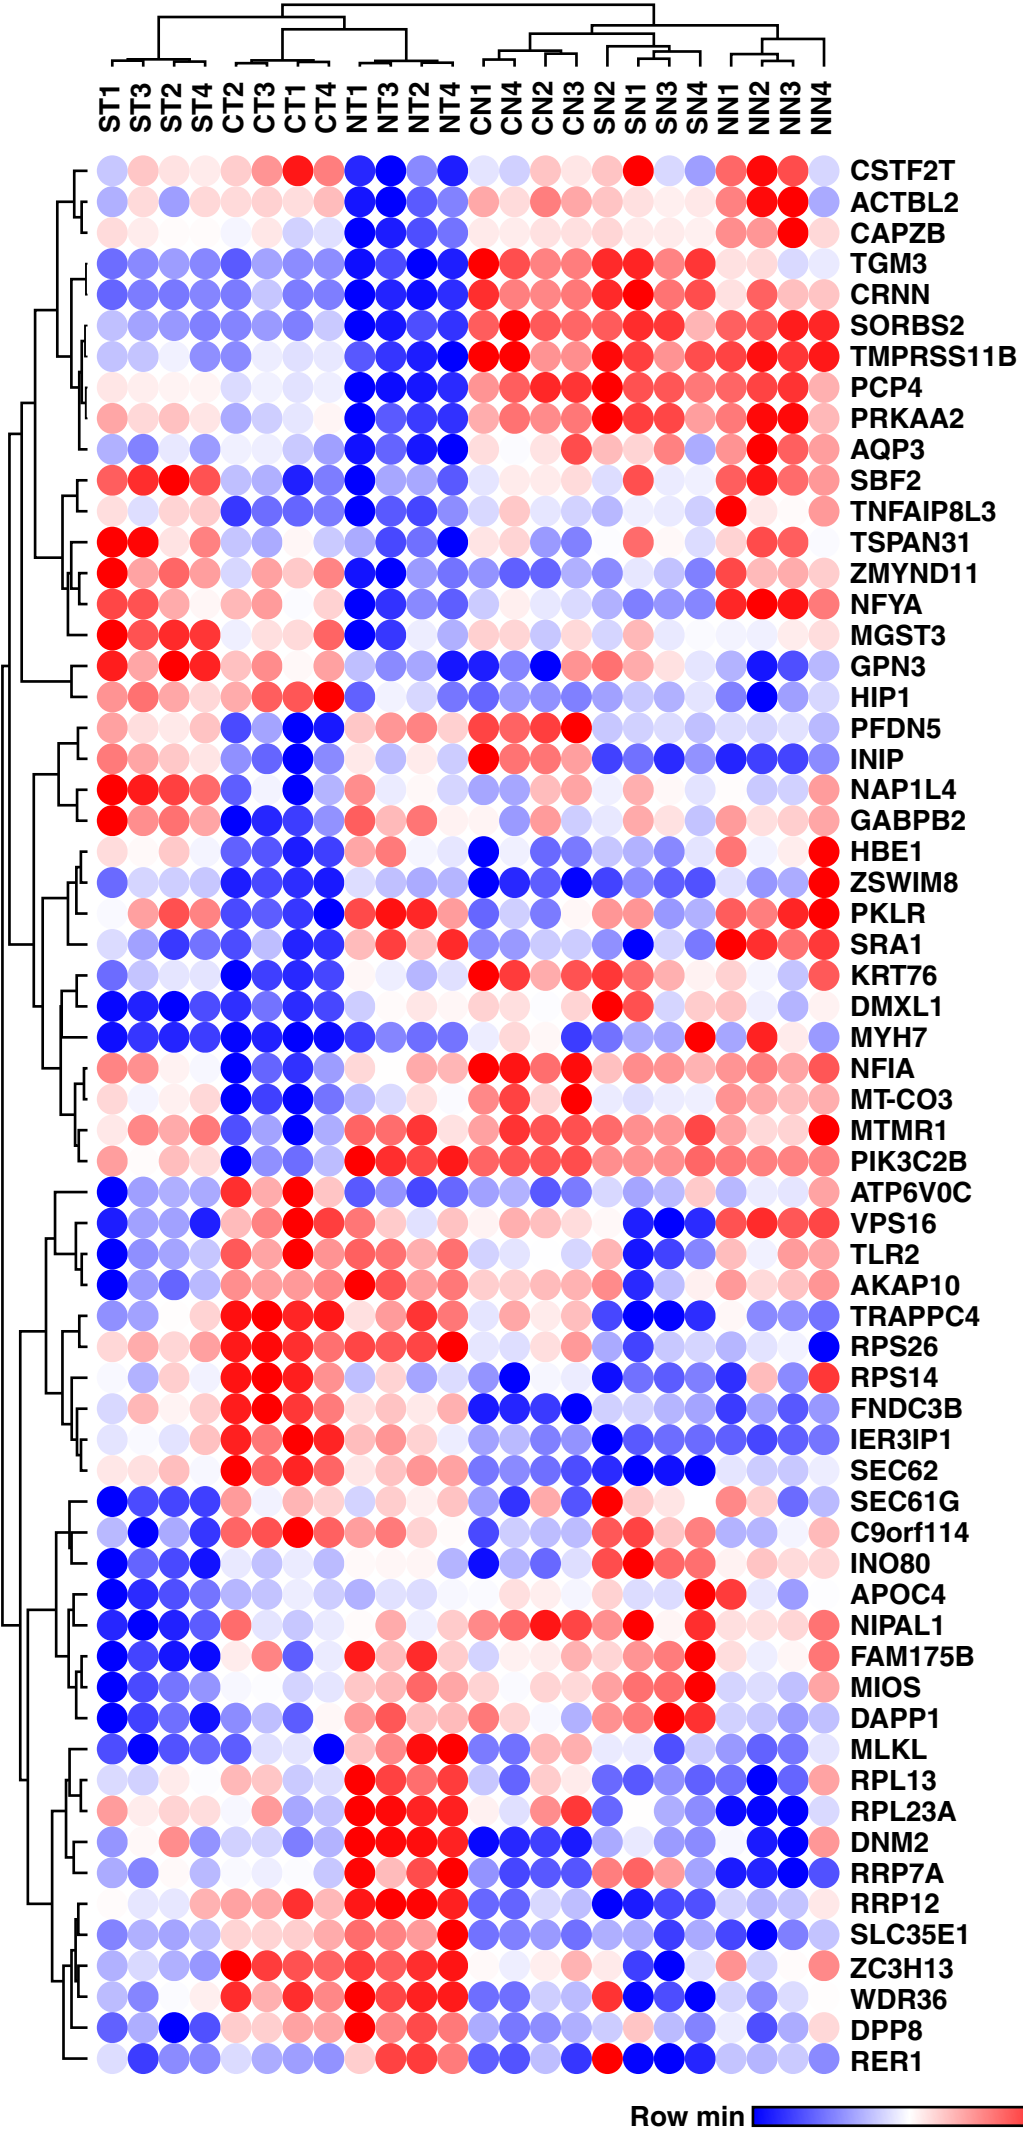

Row min Row max

Supplement: s1 [file s1]

Supplementary Figure S1A

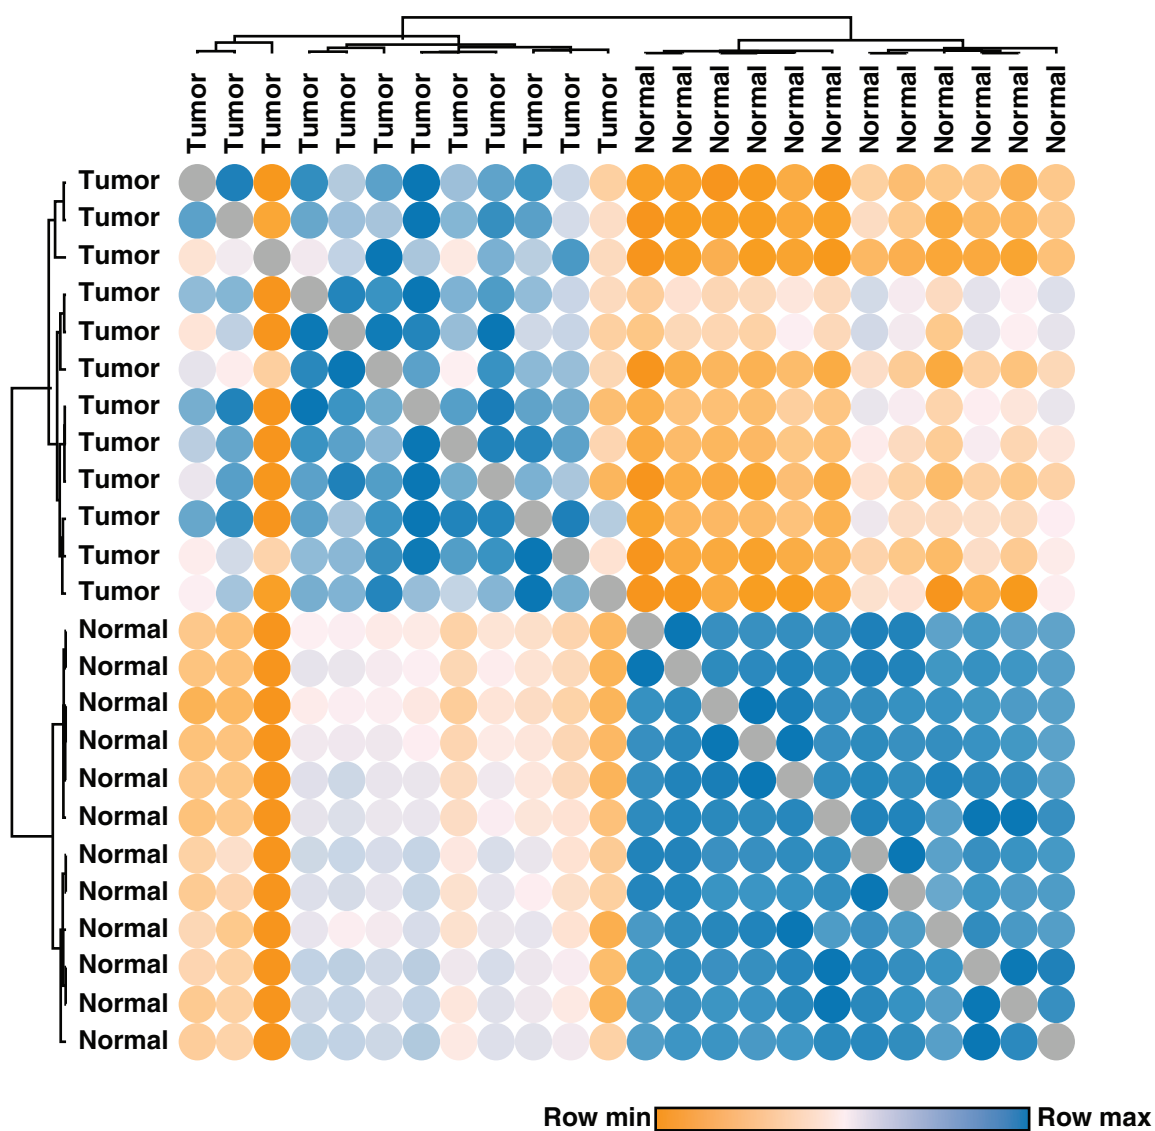

Supplement: s1 [file s1]

Supplementary Figure S2

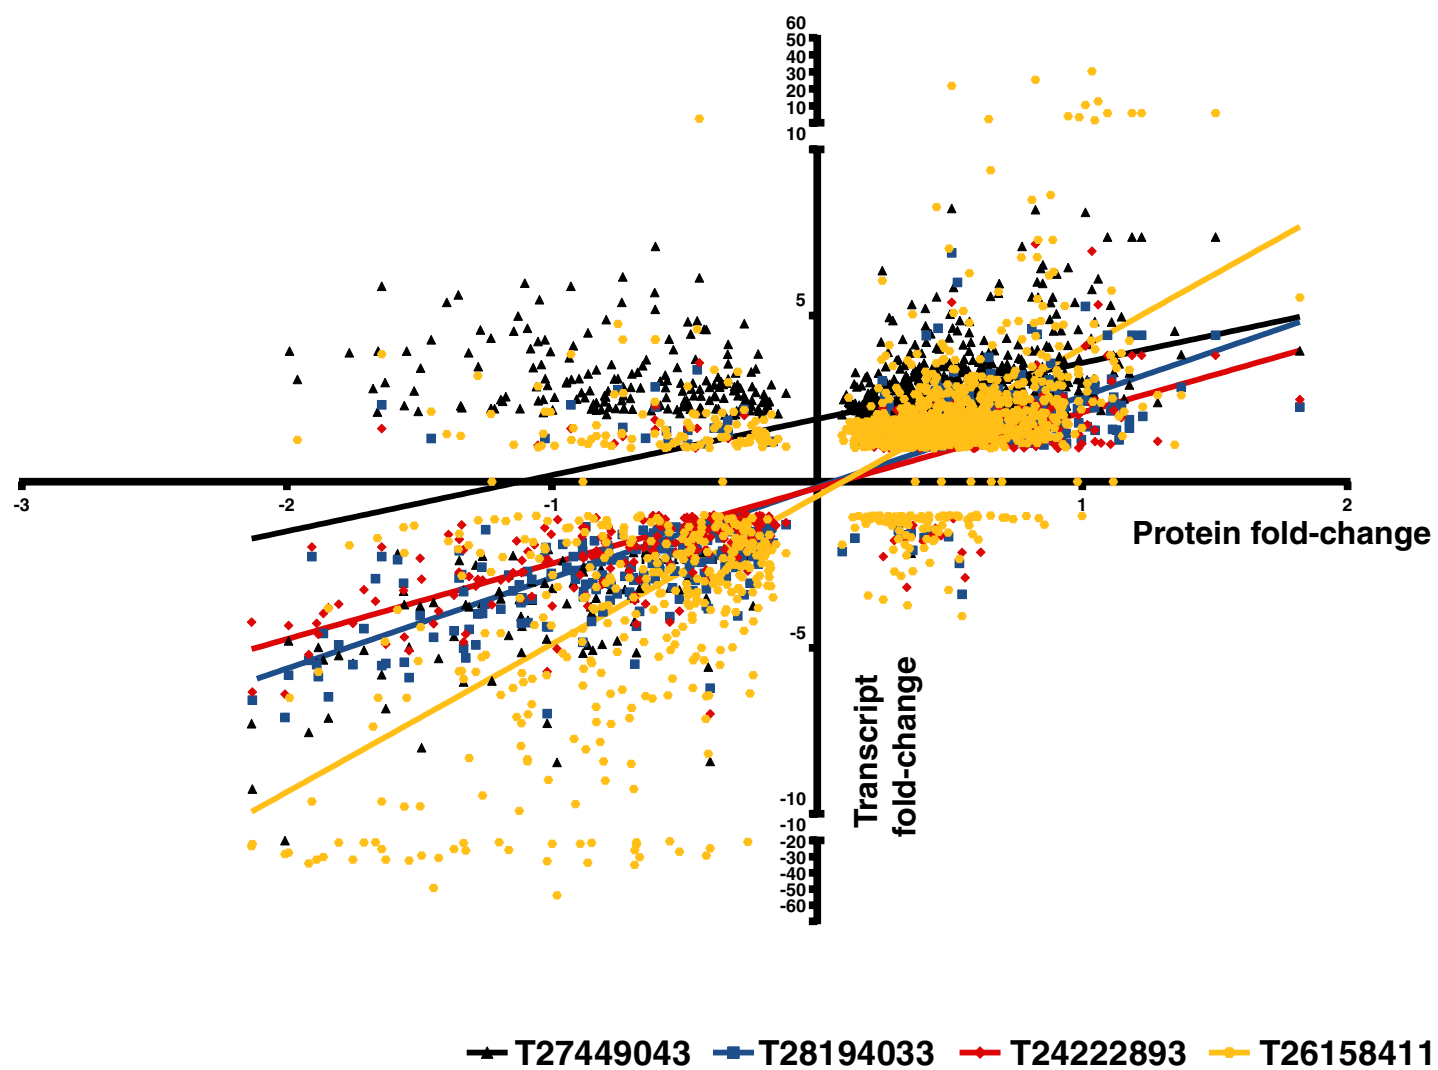

Supplement: s1 [file s1]
